# Supplementary material for: Mediterranean Diet and Sarcopenia Features in Apparently Healthy Adults over 65 Years: A Systematic Review
Source: MDPI journal article supplement (doi:10.3390/nu15051104), 2023-02-22
Supplement: s1 [file s1]

*Supplementary Materials*

# **Mediterranean Diet and Sarcopenia Features in Apparently Healthy Adults over 65 Years: A Systematic Review**

Sousana K. Papadopoulou <sup>1,\*</sup>, Paraskevi Detopoulou <sup>2</sup>, Gavriela Voulgaridou <sup>1</sup>, Despoina Tsoumana <sup>1</sup>, Maria Spanoudaki <sup>1,3</sup>, Faviola Sadikou <sup>2</sup>, Vasiliki G. Papadopoulou <sup>1</sup>, Christiana Zidrou <sup>4</sup>, Ioanna P. Chatziprodromidou <sup>5</sup>, Constantinos Giaginis <sup>6</sup> and Pantelis Nikolaidis <sup>7,\*</sup>

**Table S1.** Quality assessment of cohort studies according to the New Castle Ottawa scale (NOS).

| Author                                                                      | Milaneschi et al.<br>2011<br>[56] | Shahar et al.<br>2012<br>[57] | Talegawkar et al.<br>2012<br>[58] | Chan et al.<br>2016<br>[60] | Isanejad et al.<br>2017<br>[59] | Cervo et al.<br>2021<br>[49] |
|-----------------------------------------------------------------------------|-----------------------------------|-------------------------------|-----------------------------------|-----------------------------|---------------------------------|------------------------------|
| <b>Selection</b>                                                            |                                   |                               |                                   |                             |                                 |                              |
| 1) Representativeness of the exposed cohort                                 | ★                                 | ★                             | ★                                 | ★                           | ★                               | ★                            |
| 2) Selection of the non-exposed cohort                                      | ★                                 | ★                             | ★                                 | ★                           | ★                               | ★                            |
| 3) Ascertainment of exposure†                                               | a                                 | a                             | a                                 | a                           | a                               | a                            |
| 4) Demonstration that outcome of interest was not present at start of study | b                                 | d                             | Not clear f                       | Not clear g                 | h                               | i                            |
| <b>Comparability</b>                                                        |                                   |                               |                                   |                             |                                 |                              |
| 1) Comparability of cohorts on the basis of the design or analysis          | ★★                                | ★★                            | ★★                                | ★★                          | ★★                              | ★★                           |
| <b>Outcome</b>                                                              |                                   |                               |                                   |                             |                                 |                              |
| 1) Assessment of outcome ††                                                 | ★                                 | ★                             | ★                                 | ★                           | ★                               | ★                            |
| 2) Was follow-up long enough for outcomes to occur‡                         | ★                                 | ★                             | ★                                 | ★                           | ★                               | ★                            |
| 3) Adequacy of follow up of cohorts                                         | c                                 | e                             | ★                                 | ★                           | ★                               | j                            |
| Total quality score                                                         | 6                                 | 6                             | 7                                 | 7                           | 7                               | 6                            |

†A star was given if the exposure was based on medical record or direct measurement.

†† A star was given if the outcome was an independent blind assessment, medical record or direct measurement.

‡ A 3-year follow-up was considered enough for outcomes to occur.

a Dietary assessment was done with a food frequency questionnaire (self-report).

b The Short Physical Performance Battery test was performed at baseline and follow up. However, there was a group free of baseline mobility disability (SPPB score ≥10) in which a higher adherence to Mediterranean diet at baseline was related to lower probability of mobility disability at follow-up.

c From 937 participants 247 participants died, and 10 were lost to follow-up. Participants who were not followed up, were older, more likely to be disabled, reported more chronic diseases, had poorer cognitive function and lower extremity performance.

d Eligibility criteria included self-reporting of no mobility problems.

e The follow-up included 54% of the initial sample after 8 years. The missing subjects were older.

f Not clear. The authors do not report if they made frailty measurements at baseline.

g Sarcopenia was present in several subjects at baseline. Some analysis were done after exclusion of sarcopenic subjects at baseline.

h Sarcopenia was present in several subjects at baseline.

i Measurements performed at baseline and follow-up. Not clear if subjects were excluded from further analysis.

j 22% of the participants were lost at follow-up.

**Table S2.** Quality assessment of cross-sectional studies according to the AXIS tool.

|                                                                                                                                                           | Kim et al.<br>2019<br>[53] | Mendes et al.<br>2019<br>[61] | Borges et al.<br>2022<br>[48] | Fougère et al.<br>2015<br>[54] |
|-----------------------------------------------------------------------------------------------------------------------------------------------------------|----------------------------|-------------------------------|-------------------------------|--------------------------------|
| 1. Were the aims/objectives of the study clear?                                                                                                           | Yes                        | Yes                           | Yes                           | Yes                            |
| 2. Was the study design appropriate for the stated aim(s)?                                                                                                | Yes                        | Yes                           | Yes                           | Yes                            |
| 3. Was the sample size justified?                                                                                                                         | Yes†                       | Yes                           | No                            | No                             |
| 4. Was the target/reference population clearly defined? (Is it clear who the research was about?)                                                         | Yes                        | Yes                           | Yes                           | Yes                            |
| 5. Was the sample frame taken from an appropriate population base so that it closely represented the target/reference population under investigation?     | Yes                        | Yes                           | Not Known                     | Yes                            |
| 6. Was the selection process likely to select subjects/participants that were representative of the target/reference population under investigation?      | Yes                        | Yes                           | Not Known                     | Yes                            |
| 7. Were measures undertaken to address and categorize non-responders?                                                                                     | Yes                        | No                            | No                            | No                             |
| 8. Were the risk factor and outcome variables measured appropriate to the aims of the study?                                                              | Yes                        | Yes                           | Yes                           | Yes                            |
| 9. Were the risk factor and outcome variables measured correctly using instruments/ measurements that had been trialled, piloted or published previously? | Yes                        | Yes                           | Yes                           | Yes                            |
| 10. Is it clear what was used to determined statistical significance and/or precision estimates? (eg, p values, CIs)                                      | Yes                        | Yes                           | Yes                           | Yes                            |
| 11. Were the methods (including statistical methods) sufficiently described to enable them                                                                | Yes                        | Yes                           | Yes                           | Yes                            |
| 12. Were the basic data adequately described?                                                                                                             | Yes                        | Yes                           | Yes                           | Yes                            |
| 13. Does the response rate raise concerns about non-response bias?                                                                                        | No                         | ND                            | ND                            | ND                             |
| 14. If appropriate, was information about non-responders described?                                                                                       | Yes                        | ND                            | ND                            | ND                             |
| 15. Were the results internally consistent?                                                                                                               | Yes                        | Yes                           | Yes                           | Yes                            |
| 16. Were the results for the analyses described in the methods, presented?                                                                                | Yes                        | Yes                           | Yes                           | Yes                            |
| 17. Were the authors' discussions and conclusions justified by the results?                                                                               | Yes                        | Yes                           | Yes                           | Yes                            |
| 18. Were the limitations of the study discussed?                                                                                                          | Yes                        | Yes                           | Yes                           | Yes                            |
| Other                                                                                                                                                     |                            |                               |                               |                                |
| 19. Were there any funding sources or conflicts of interest that may affect the authors' interpretation of the results?                                   | No                         | No                            | No                            | No                             |
| 20 Was ethical approval or consent of participants attained?                                                                                              | Yes                        | Yes                           | Yes                           | Yes                            |

† Power analysis was not performed but the sample is based on the national population-based Korea National Health and Nutrition Examination Survey.

ND: Not determined.
